# Supplementary material for: Streptococcus pneumoniae Binds to Host Lactate Dehydrogenase via PspA and PspC To Enhance Virulence
Source: PubMed Central journal article supplement (PMC8437407; doi:10.1128/mbio.00673-21), 2021-05-04
Supplement: mbio.00673-21-sf001.pdf [file mbio.00673-21-sf001.pdf]

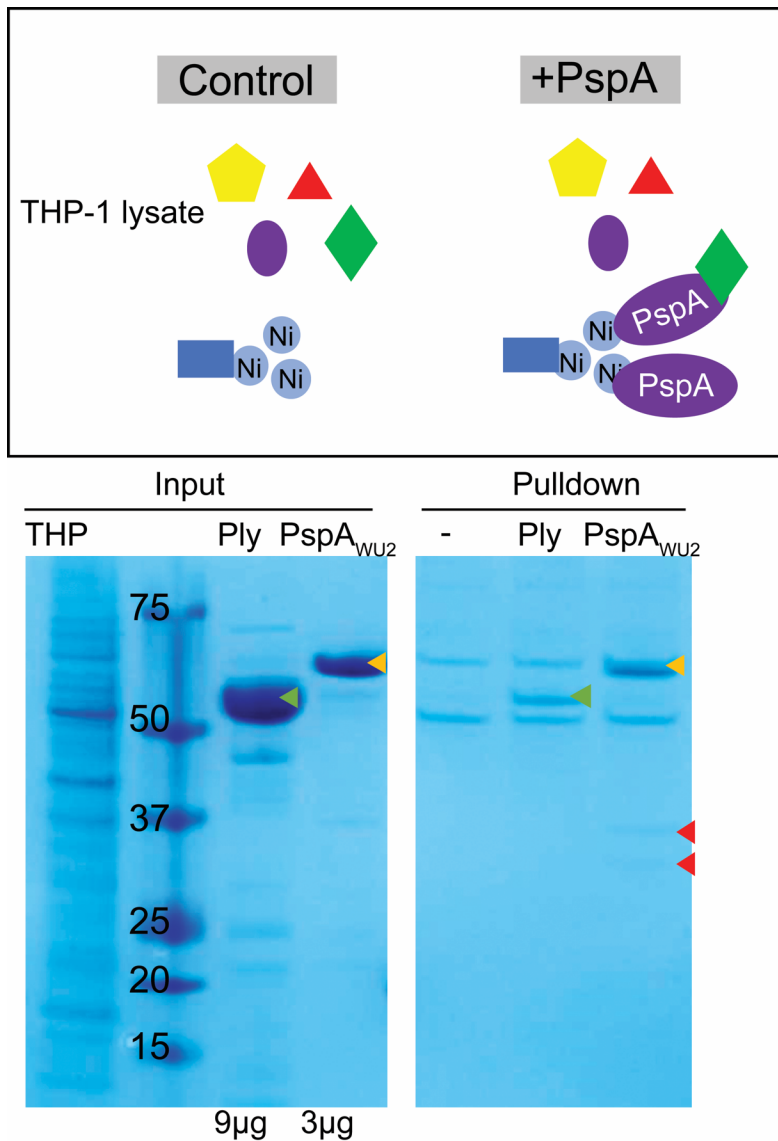

**Figure S1. Purified PspA binds to host LDH and GAPDH.** Recombinant His-tagged pneumolysin (Ply, green arrow) or PspA<sub>WU2</sub> (yellow arrow) were pulled-down with human macrophage THP-1 cell lysate using Ni-NTA resin. The input and bound proteins were separated by SDS-PAGE and visualized by Coomassie blue dye. PspA bound host proteins (red arrows) were listed on Table S1.
