# Supplementary material for: Streptococcus pneumoniae Binds to Host Lactate Dehydrogenase via PspA and PspC To Enhance Virulence
Source: PubMed Central journal article supplement (PMC8437407; doi:10.1128/mbio.00673-21), 2021-05-04
Supplement: mbio.00673-21-sf003.pdf [file mbio.00673-21-sf003.pdf]

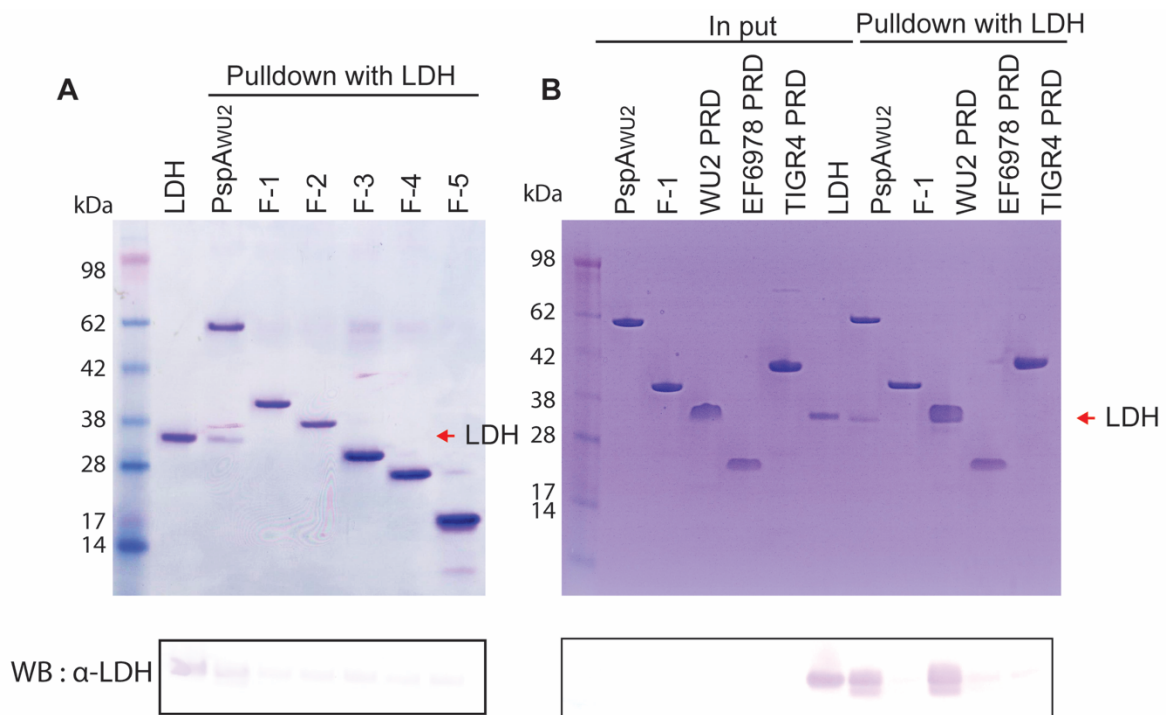

**Figure S3. LDH binds to Group 3 PRD motif.** (A) PspA<sub>WU2</sub>, fragments (F-1, F-2, F-3, F-4 and F-5), (B) PRDs (WU2 PRD, EF6978 PRD and TIGR4 PRD) as bait were pulled-down with LDH and as visualized by Coomassie blue stains. Bound LDH were detected by immunoblotting using monoclonal anti-LDH antibody. The red arrow indicated LDH size.
