# Supplementary material for: Streptococcus pneumoniae Binds to Host Lactate Dehydrogenase via PspA and PspC To Enhance Virulence
Source: PubMed Central journal article supplement (PMC8437407; doi:10.1128/mbio.00673-21), 2021-05-04
Supplement: mbio.00673-21-sf004.pdf [file mbio.00673-21-sf004.pdf]

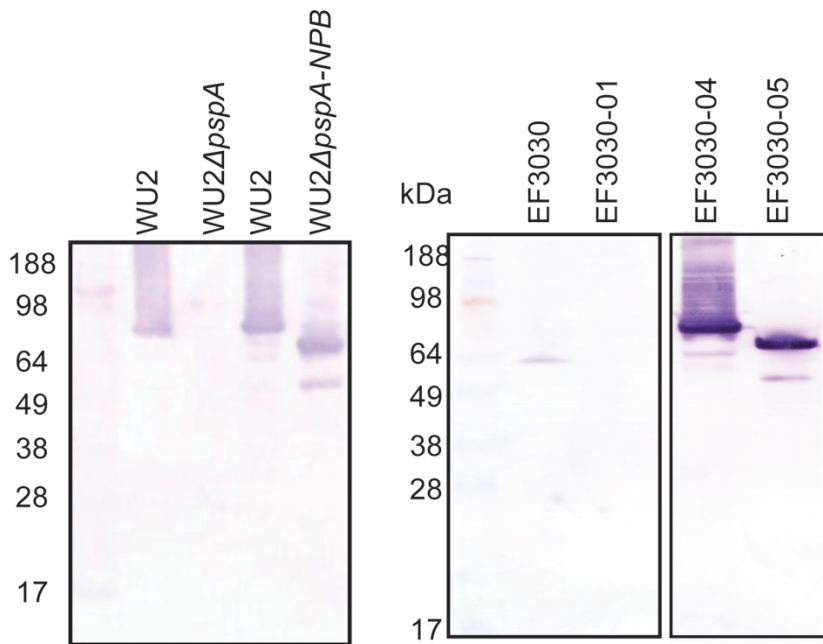

**Figure S4. PspA patterns of WU2 and EF3030 wild type or different isogenic mutants.** Total cell lysates of *Spn* WU2, EF3030, isogenic *pspA* mutants (*WU2ΔpspA* and EF3030-01), isogenic *pspA* mutants (*WU2ΔNPB*), EF3030 expressing PspA<sub>WU2</sub> (EF3030-04) and EF3030 expressing PspA<sub>WU2</sub> without NPB (EF3030-05) were electrophorized on SDS-PAGE. Subsequently, expressed PspA were detected by using monoclonal anti-PspA antibody.
