# Supplementary material for: Streptococcus pneumoniae Binds to Host Lactate Dehydrogenase via PspA and PspC To Enhance Virulence
Source: PubMed Central journal article supplement (PMC8437407; doi:10.1128/mbio.00673-21), 2021-05-04
Supplement: mbio.00673-21-sf005.pdf [file mbio.00673-21-sf005.pdf]

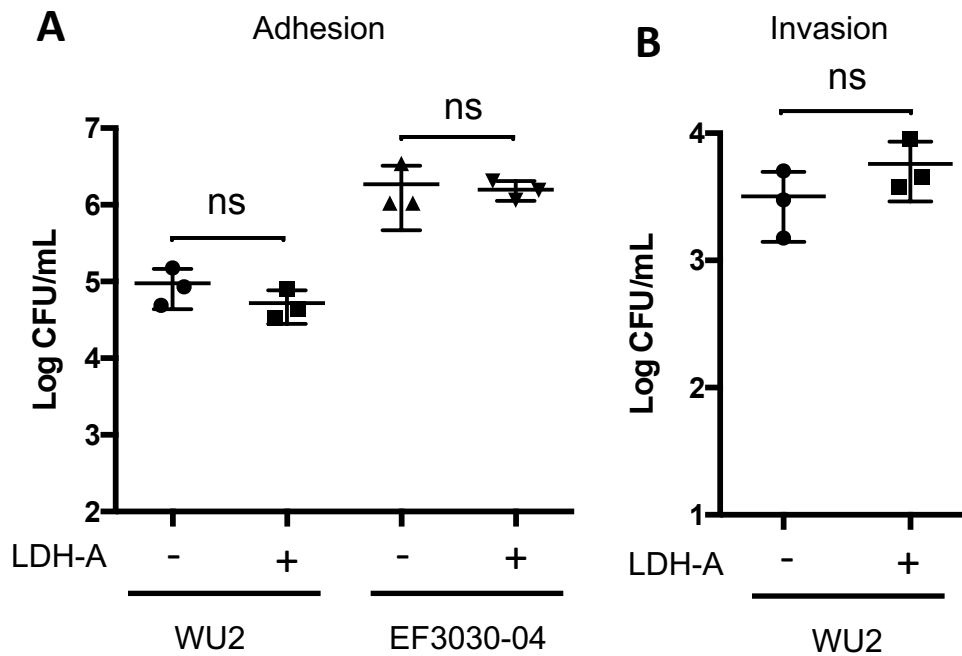

**Figure S5. LDH does not affect *Spn* adhesion and invasion.** Pre-incubated *Spn* WU2 or EF3030-04 with LDH were incubated A549 cell for 1 h and then washed (adhesion) 3 times by PBS or changed DMEM media with ampicillin/streptomycin (invasion) and incubated for 2 h and then washed by PBS 3X. Subsequently A549 cell were detached by Trypsin-EDTA and then total bacterial CFU were calculated on blood agar plate (N=3). Mean and standard error shown.
