# Supplementary material for: Streptococcus pneumoniae Binds to Host Lactate Dehydrogenase via PspA and PspC To Enhance Virulence
Source: PubMed Central journal article supplement (PMC8437407; doi:10.1128/mbio.00673-21), 2021-05-04
Supplement: mbio.00673-21-sf006.pdf [file mbio.00673-21-sf006.pdf]

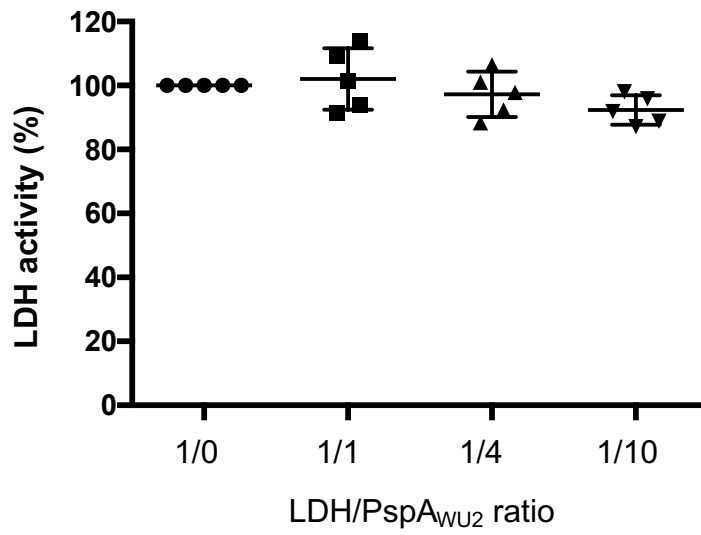

**Figure S6. PspA does not affect LDH enzyme activity.** Enzyme activity of pre-incubated LDH with different ratios of PspA<sub>WU2</sub> were measured using a LDH assay kit (N=5). Mean and standard error shown.
