# Supplementary material for: Streptococcus pneumoniae Binds to Host Lactate Dehydrogenase via PspA and PspC To Enhance Virulence
Source: PubMed Central journal article supplement (PMC8437407; doi:10.1128/mbio.00673-21), 2021-05-04
Supplement: mbio.00673-21-sf007.pdf [file mbio.00673-21-sf007.pdf]

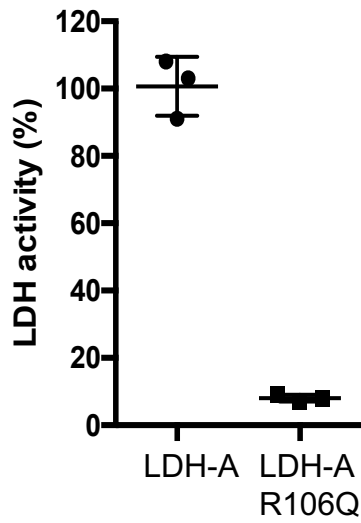

**Figure S7. Non-functional point mutant LDH loses enzyme activity.** Enzyme activity of LDHA or non-functional point mutant LDHA (R106Q) were measured using a LDH assay kit (N=3). Mean and standard error shown.
