# Supplementary material for: Streptococcus pneumoniae Binds to Host Lactate Dehydrogenase via PspA and PspC To Enhance Virulence
Source: PubMed Central journal article supplement (PMC8437407; doi:10.1128/mbio.00673-21), 2021-05-04
Supplement: mbio.00673-21-st001.pdf [file mbio.00673-21-st001.pdf]

Table S1. List of PspA interacted THP-1 proteins

| <b>Accession</b> | <b>Description</b>                                                                         | <b>#<br/>PSMs</b> |
|------------------|--------------------------------------------------------------------------------------------|-------------------|
| P08670           | Vimentin OS=Homo sapiens OX=9606 GN=VIM PE=1 SV=4                                          | 1381              |
| P02545           | Prelamin-A/C OS=Homo sapiens OX=9606 GN=LMNA PE=1 SV=1                                     | 905               |
| <b>P04406</b>    | <b>Glyceraldehyde-3-phosphate dehydrogenase OS=Homo sapiens OX=9606 GN=GAPDH PE=1 SV=3</b> | <b>583</b>        |
| P23246           | Splicing factor, proline- and glutamine-rich OS=Homo sapiens OX=9606 GN=SFPQ PE=1 SV=2     | 282               |
| <b>P00338</b>    | <b>L-lactate dehydrogenase A chain OS=Homo sapiens OX=9606 GN=LDHA PE=1 SV=2</b>           | <b>277</b>        |
