# Supplementary material for: Streptococcus pneumoniae Binds to Host Lactate Dehydrogenase via PspA and PspC To Enhance Virulence
Source: PubMed Central journal article supplement (PMC8437407; doi:10.1128/mbio.00673-21), 2021-05-04
Supplement: mbio.00673-21-st002.pdf [file mbio.00673-21-st002.pdf]

**Table S2. Bacteria species and strains for this study**

| Strain                                                           | Capsular type    | Mutation                                                                                                                                                                                                | Reference  |
|------------------------------------------------------------------|------------------|---------------------------------------------------------------------------------------------------------------------------------------------------------------------------------------------------------|------------|
| <b><i>Streptococcus pneumoniae</i></b>                           |                  |                                                                                                                                                                                                         |            |
| WU2                                                              | 3                | Clinical isolated                                                                                                                                                                                       | (6)        |
| WU2 $\Delta$ pspA <i>kam</i> <sup>R</sup>                        |                  | Isogenic deletion mutant of full length gene of <i>pspA</i> , <i>kam</i> <sup>R</sup>                                                                                                                   | This study |
| WU2 $\Delta$ pspA                                                |                  | Isogenic deletion mutant of full length gene of <i>pspA</i> , <i>erm</i> <sup>R</sup>                                                                                                                   | This study |
| WU2 $\Delta$ NPB                                                 |                  | Isogenic deletion mutant of NPB on <i>pspA</i> , <i>erm</i> <sup>R</sup>                                                                                                                                | This study |
| TIGR4                                                            | 4                | Clinical isolated                                                                                                                                                                                       | (7)        |
| EF3030                                                           | 19F              | Clinical isolated                                                                                                                                                                                       | (8)        |
| EF3030 $\Delta$ pspA <i>kam</i> <sup>R</sup>                     |                  | Isogenic deletion mutant of full length gene of <i>pspA</i> , <i>kam</i> <sup>R</sup>                                                                                                                   | This study |
| EF3030-01                                                        |                  | Isogenic deletion mutant using <i>erm</i> <sup>R</sup>                                                                                                                                                  | This study |
| EF3030-04                                                        |                  | Isogenic deletion mutant, replacement pspA from WU2, <i>erm</i> <sup>R</sup>                                                                                                                            | This study |
| EF3030-05                                                        |                  | Isogenic deletion mutant, replacement pspA without NPB from WU2, <i>erm</i> <sup>R</sup>                                                                                                                | This study |
| EF3296                                                           | 4                | Clinical isolated                                                                                                                                                                                       | (8)        |
| DBL1                                                             | 6B               | Clinical isolated                                                                                                                                                                                       | (9)        |
| L81905                                                           | 4                | Clinical isolated                                                                                                                                                                                       | (9)        |
| E134                                                             | 23               | Clinical isolated                                                                                                                                                                                       | (10)       |
| BG11703                                                          | 18               | Clinical isolated                                                                                                                                                                                       | (8)        |
| RX1                                                              | Non-encapsulated |                                                                                                                                                                                                         | (11)       |
| BG7817                                                           | 12               | Clinical isolated                                                                                                                                                                                       | (8)        |
| AC94                                                             | 9                | Clinical isolated                                                                                                                                                                                       | (8)        |
| BG6380                                                           | 37               | Clinical isolated                                                                                                                                                                                       | (8)        |
| BG8743                                                           | 23               | Clinical isolated                                                                                                                                                                                       | (8)        |
| <b><i>Escherichia coli</i></b>                                   |                  |                                                                                                                                                                                                         |            |
| NEB <sup>®</sup> Express I <sup>q</sup> Competent <i>E. coli</i> |                  | <i>MiniF lacI<sup>q</sup>(Cam<sup>R</sup>) / fhuA2 [lon] ompT gal sulA11 R(mcr-73::miniTn10--Tet<sup>S</sup>)2 [dcm] R(zgb-210::Tn10--Tet<sup>S</sup>) endA1 <math>\Delta</math>(mcrC-mrr)114::IS10</i> | NEB        |

|                              |  |                                                                                                                   |         |
|------------------------------|--|-------------------------------------------------------------------------------------------------------------------|---------|
| BL21(DE3)                    |  | <i>gal (clts857 ind1 Sam7 nin5 lacUV5-T7 gene 1)</i>                                                              | Novagen |
| XL1-Blue                     |  | <i>recA1 endA1 gyrA96 thi-1 hsdR17 supE44 relA1 lac [F' proAB lacI<sup>q</sup> Z DM15 Tn10 (Tet<sup>r</sup>)]</i> | Novagen |
| <b>Other Pathogens</b>       |  |                                                                                                                   |         |
| <i>Staphylococcus aureus</i> |  | Clinical isolate                                                                                                  | (12)    |
| Uropathogenic <i>E. coli</i> |  | Clinical isolate                                                                                                  | (12)    |

**Table S2. List of plasmids and primers for this study**

| Name                                 | Relevant characteristics                                                       | Refence or source              |
|--------------------------------------|--------------------------------------------------------------------------------|--------------------------------|
| <b>Plasmids</b>                      |                                                                                |                                |
| pCR2.1<br><i>erm<sup>R</sup></i>     | pCR2.1, contained <i>erm<sup>R</sup></i> cassette                              | (13)                           |
| pCR2.1<br><i>kan<sup>R</sup></i>     | pCR2.1, contained <i>kan<sup>R</sup></i> cassette                              | This study                     |
| pQE-SS01<br>(F-1)                    | T5 promotor, N-terminal his-tagged fragment of PspA <sub>WU2</sub> (32-317aa)  | This study                     |
| pQU-SS02<br>(PspA <sub>WU2</sub> )   | T5 promotor, N-terminal his-tagged PspA <sub>WU2</sub> (32-417aa)              | This study                     |
| pQE-SS10<br>(F-2)                    | T5 promotor, N-terminal his-tagged fragment of PspA <sub>WU2</sub> (32-281aa)  | This study                     |
| pQE-SS11<br>(F-3)                    | T5 promotor, N-terminal his-tagged fragment of PspA <sub>WU2</sub> (32-229aa)  | This study                     |
| pQE-SS12<br>(F-4)                    | T5 promotor, N-terminal his-tagged fragment of PspA <sub>WU2</sub> (32-200aa)  | This study                     |
| pQE-SS13<br>(F-5)                    | T5 promotor, N-terminal his-tagged fragment of PspA <sub>WU2</sub> (32-148aa)  | This study                     |
| pQE-SS04<br>(WU2PRD)                 | T5 promotor, N-terminal his-tagged fragment of PspA <sub>WU2</sub> (318-417aa) | This study                     |
| pET32b-<br>TIGR4<br>PRD              | N-terminal thioredoxin and his-tagged TIGR4 PRD                                | (14)                           |
| pQE-<br>EF6796<br>PRD                | T5 promotor, N-terminal his tagged EF6796 PRD                                  | This study                     |
| LDHB<br>protein<br>vector<br>(human) | pPB-His-GST (PV375851)<br>contained N-terminal Nhe1 site, C-terminal Xho1 site | Applied biological<br>material |
| LDHA<br>protein<br>vector<br>(human) | pPB-His-GST (PV375815)<br>contained N-terminal Nhe1 site, C-terminal Xho1 site | Applied biological<br>material |
| pTEV5                                | N-terminal his-tag and TEV recognition site                                    | (15)                           |
| pTEV5-<br>LDHA                       | pTEV5-human LDHA from LDHA protein vector                                      | This study                     |
| pTEV5-<br>LDHB                       | pTEV5-human LDHB from LDHB protein vector                                      | This study                     |
| <b>Primers</b>                       |                                                                                |                                |

|                                      |                                              |
|--------------------------------------|----------------------------------------------|
| LDHA<br>R106Q Fw                     | 5'-AAGAGGGAGAAAGCCAGCTTAATTTGGTCCAG          |
| LDHA<br>R106Q Rw                     | 5'-CTGGACCAAATTAAGCTGGCTTTCTCCCTCTT          |
| delNPB-<br>MF                        | 5'-CAACCCAAACCAGCTCCAGCAGAAAAACCAGCTCCAGCACC |
| delNPB-<br>MR                        | 5'-GGTGCTGGAGCTGGTTTTTCTGCTGGAGCTGGTTTGGGTTG |
| pspA-F                               | 5'-CGCGGATCCAAGCTTATGATATAGAAATTTGTAAC       |
| pspA-R                               | 5'-GAGGAGCTCTTAAACCCATTACCATTTGGC            |
| EF6796<br>Fw                         | 5'-CCTTAAGAAAGCAGTTGGATCCCCAGAAAC            |
| EF6796<br>Rw                         | 5'-CCGTTTTCTTGTTAAGCTTATATTTTTGG             |
| PspA <sub>WU2</sub><br>(31-)-F       | GTAGGATCCGAAGAATCTCCCGTAGC                   |
| PspA <sub>WU2</sub> (-<br>417)-R     | CCGTGGTACCGTTTCCATCATGTTTT                   |
| PspA <sub>WU2</sub> (-<br>317)-R     | CTGAGGTACCTCACTCATTAAGTCTTTCTT               |
| PspA <sub>WU2</sub> (-<br>317)-F     | CCTTAAGAAAGCAGTTGGATCCCCAGAAA                |
| PspA <sub>WU2</sub> (-<br>281)-R     | ACCCGGGTACCTCATTCTTCAGCAGCTTTAAG             |
| PspA <sub>WU2</sub> (-<br>229)-R     | ACCCGGGTACCTCATTCTTCAGCATCCACTTTTTG          |
| PspA <sub>WU2</sub> (-<br>200)-R     | ACCCGGGTACCTCATGATTCAGACTCATCAATCTC          |
| PspA <sub>WU2</sub> (-<br>148)-R     | ACCCGGGTACCTCAAACCTACCATTGTTGTTTGAATAGT      |
| PspA-L-F                             | GCTCTAGAAATATAAAGTATAGTCTAAAAATGA            |
| PspA-L-R                             | ATAAGAATGCGGCCGCAACAAAACCAGCCCC              |
| PspA-R1-F                            | CGCGGATCCGGTGAATGGGTTTAAGCCG                 |
| PspA-R1-R                            | CCCAAGCTTCAACCCATTTTCTCTAATC                 |
| kan <sup>R</sup> -<br>cassette-<br>F | ATAAGAATGCGGCCGCGCAAGGAACAGTGAATTGGA         |
| kan <sup>R</sup> -<br>cassette-<br>R | CGGAATTCCAGTTGCGGATGTAATTCAG                 |
| PspA-R2-<br>F                        | GGACTAGTAGCCGATTAAATT                        |

PspA-R2-  
R

CGGGATCCCGTCCGGATTTGGCG
